# Supplementary material
Source: PubMed Central journal article supplement (PMC2884290)

# Supplemental Figure 1

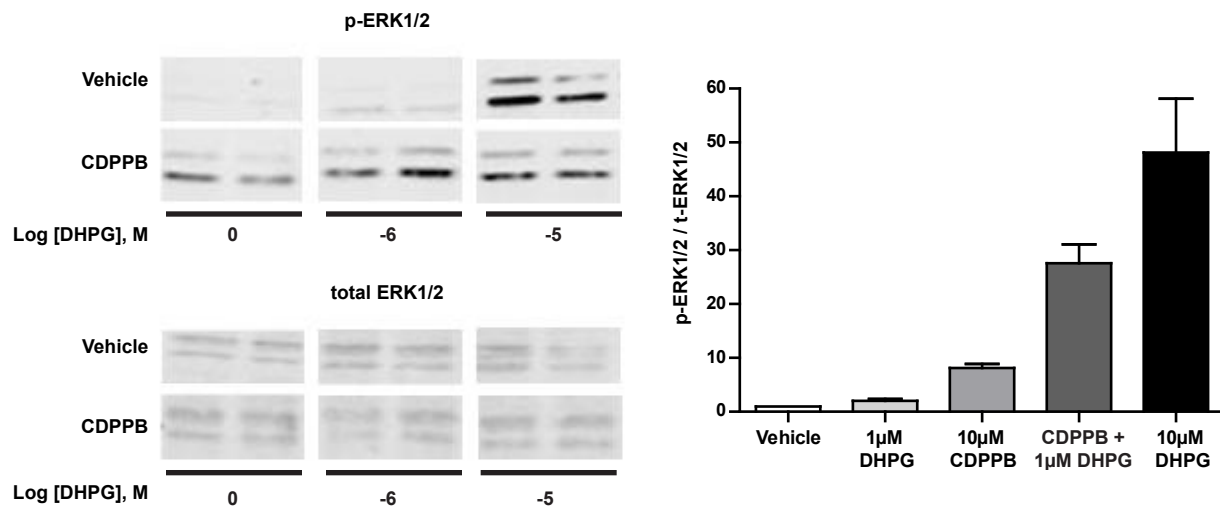

Supplement: NIHMS93481-supplement-2.pdf [file NIHMS93481-supplement-2.pdf]

Supplemental Figure 2

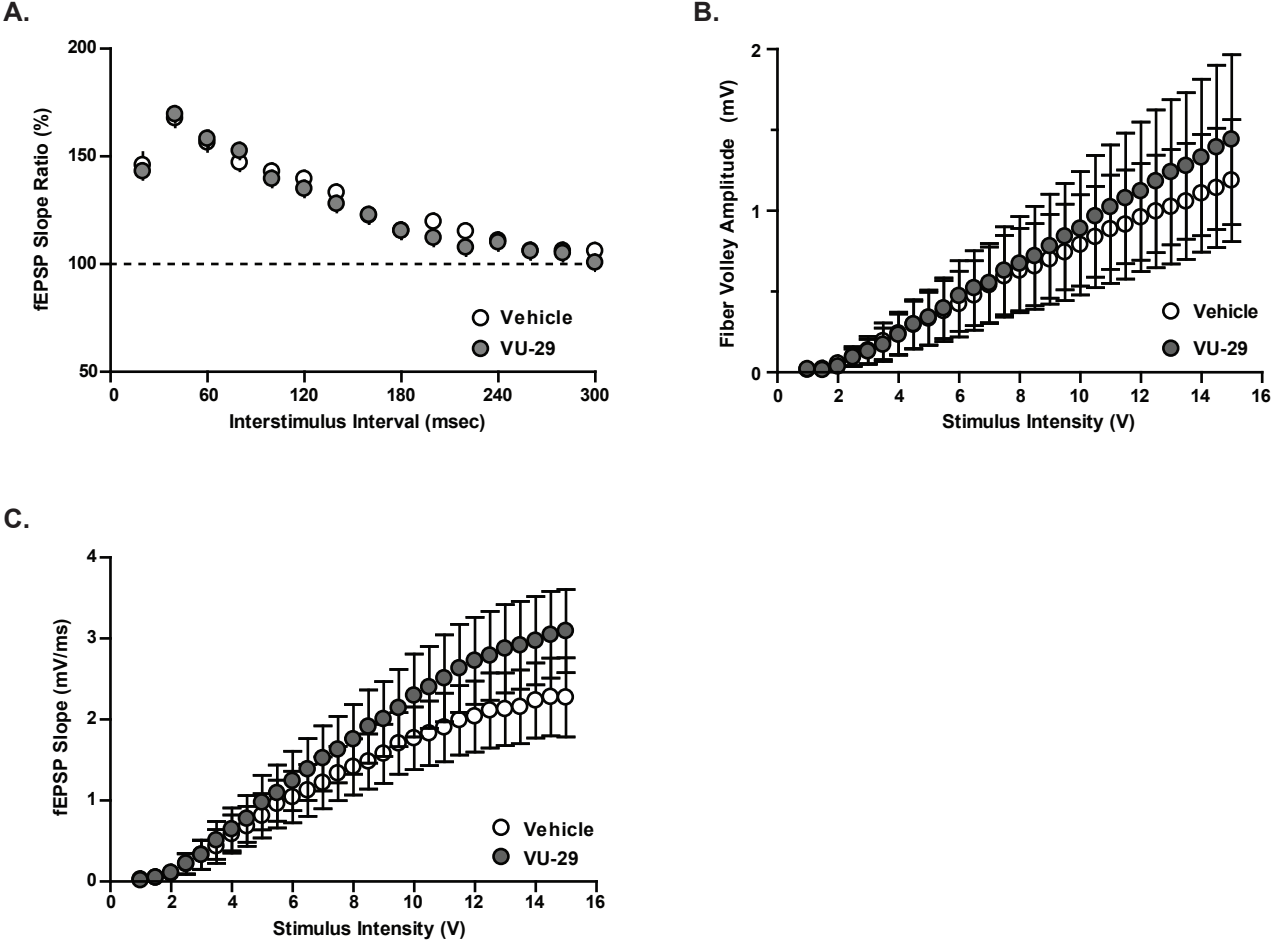

Supplement: NIHMS93481-supplement-3.pdf [file NIHMS93481-supplement-3.pdf]

Supplemental Figure 3

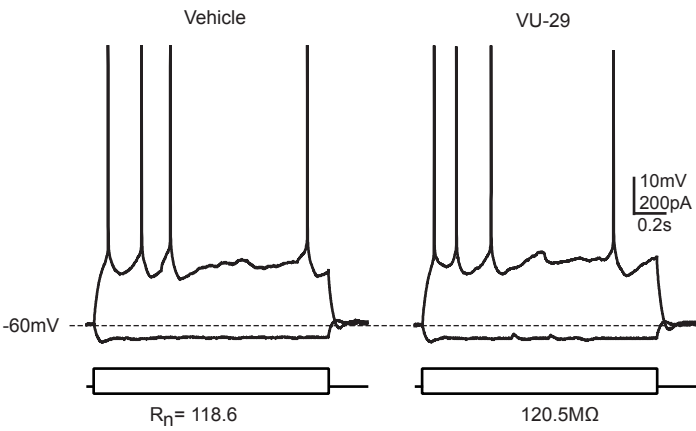

Supplement: NIHMS93481-supplement-4.pdf [file NIHMS93481-supplement-4.pdf]

Supplemental Figure 4

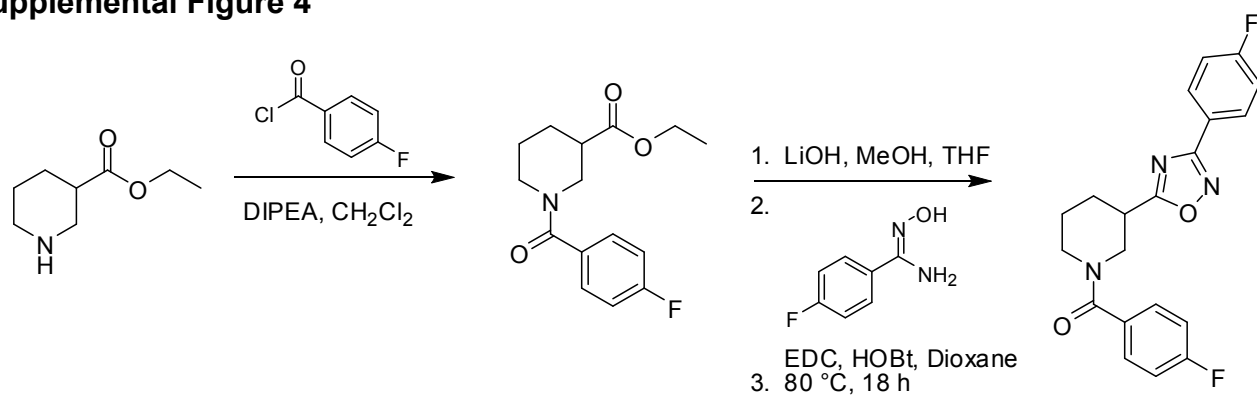

Supplement: NIHMS93481-supplement-5.pdf [file NIHMS93481-supplement-5.pdf]

Supplemental Figure 5

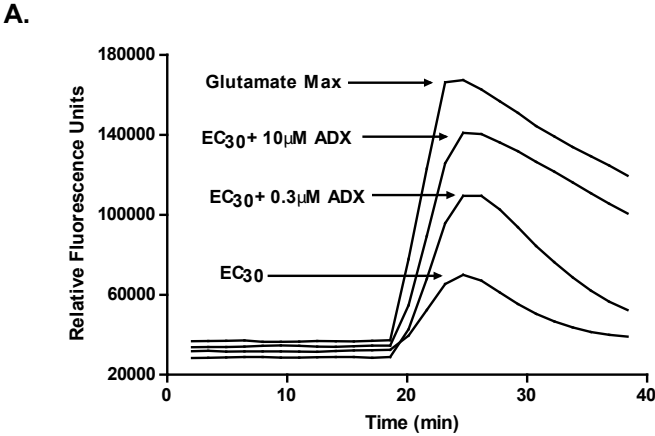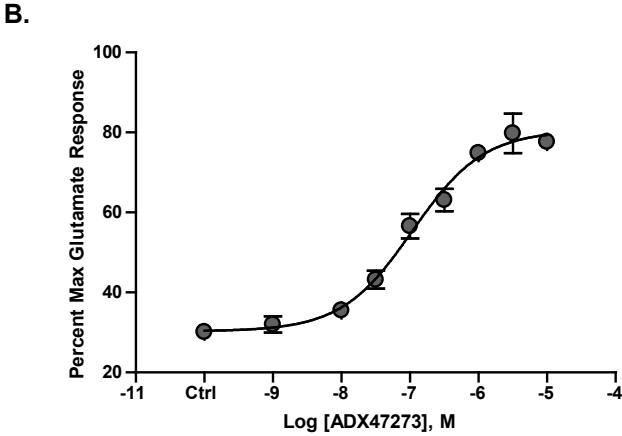

Supplement: NIHMS93481-supplement-6.pdf [file NIHMS93481-supplement-6.pdf]

# Supplemental Figure 6

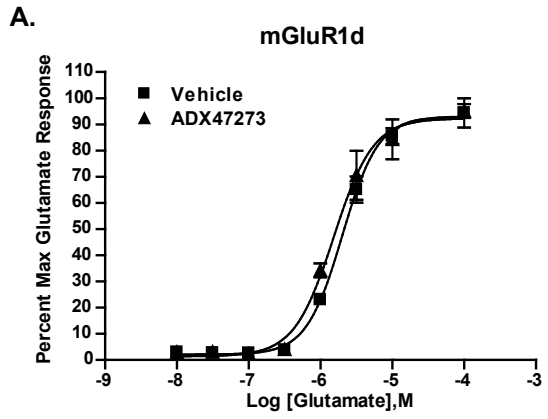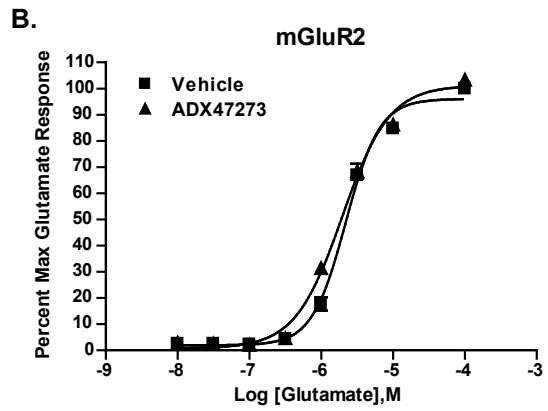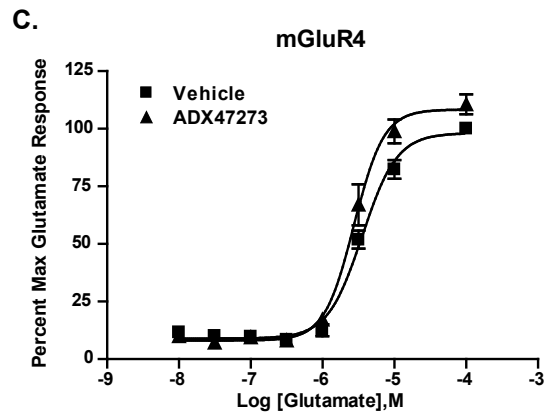

Supplement: NIHMS93481-supplement-7.pdf [file NIHMS93481-supplement-7.pdf]

Supplemental Figure 7

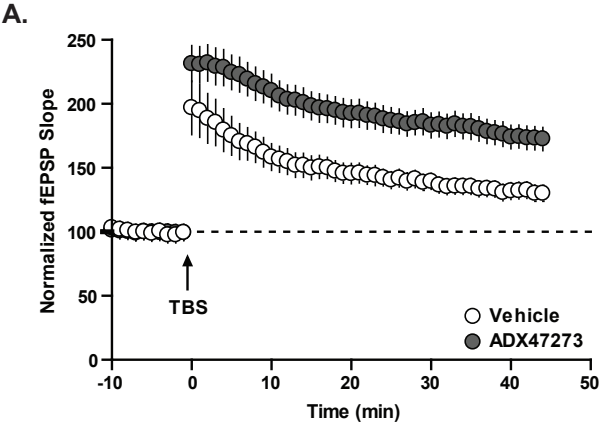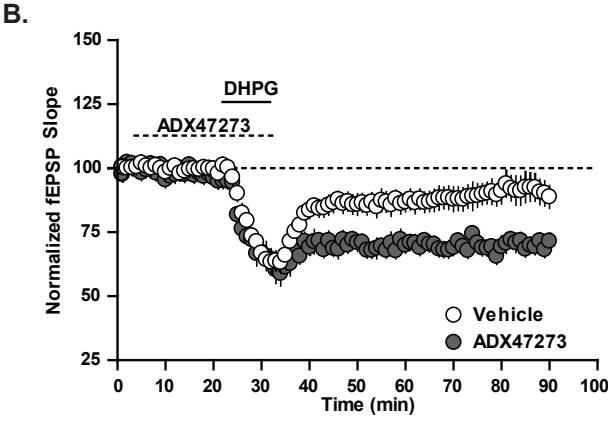

Supplement: NIHMS93481-supplement-8.pdf [file NIHMS93481-supplement-8.pdf]
